# Supplementary material for: Low pH Facilitates Heterodimerization of Mutant Isocitrate Dehydrogenase IDH1-R132H and Promotes Production of 2-Hydroxyglutarate
Source: PubMed Central journal article supplement — Biochemistry. 2021 Jun 18;60(25):1983–94. doi: 10.1021/acs.biochem.1c00059 (PMC8246651; doi:10.1021/acs.biochem.1c00059), 2021-06-18
Supplement: bi1c00059_si_001.pdf [file bi1c00059_si_001.pdf]

## Supporting Information

4 pages

Supplemental Figures S1-S3

### Title:

Low pH facilitates heterodimerization of mutant isocitrate dehydrogenase IDH1-R132H and promotes production of 2-hydroxyglutarate

Rae Sesanto<sup>1,†</sup>, Jessamine F. Kuehn<sup>2,3,†</sup>, Diane L. Barber<sup>1</sup>, Katharine A. White<sup>2,3\*</sup>

1 Department of Cell and Tissue Biology, University of California San Francisco, San Francisco, CA, 94122

2 Department of Chemistry and Biochemistry, The University of Notre Dame, Notre Dame, IN, 46556

3 Harper Cancer Research Institute, South Bend, IN, 46617

\* To whom correspondence should be addressed: Katharine A. White [kwhite6@nd.edu](mailto:kwhite6@nd.edu)

† These authors contributed equally to this work.

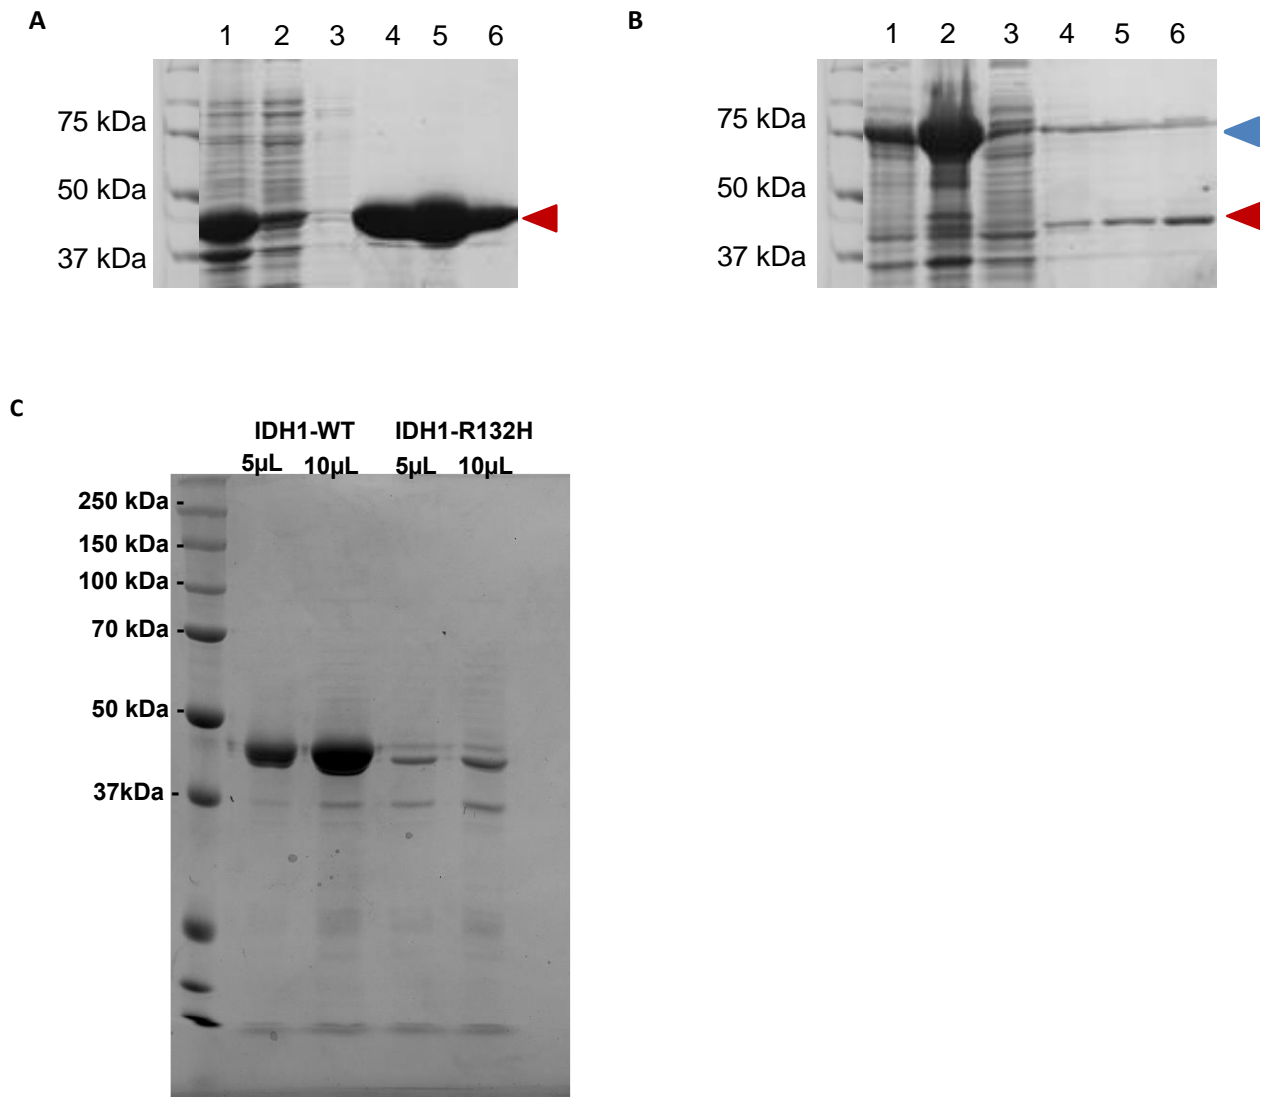

**Figure S1. IDH1-WT and IDH1-R132H purified from *E. Coli* have similar purity levels.** IDH1 protein was run on an SDS-PAGE electrophoresis gel (see methods). Two independent protein preparations are shown. A) 10% SDS-PAGE gel of purified IDH1-WT and B) IDH1-R132H proteins. 1: pellet, 2: flow through, 3: wash; 4-6: purified fractions. Red arrow is monomer. Blue arrow is a higher molecular weight protein that is occasionally co-eluted with IDH1-R132H, possibly a chaperone or Heat Shock Protein. C) Second representative preparation. IDH1-WT (5  $\mu$ L, 10  $\mu$ L) and IDH1-R132H (5  $\mu$ L, 10  $\mu$ L). All samples are pure, and IDH1-WT was determined to be more concentrated than IDH1-R132H. Note no higher-molecular weight band is seen in this preparation of IDH1-R132H.

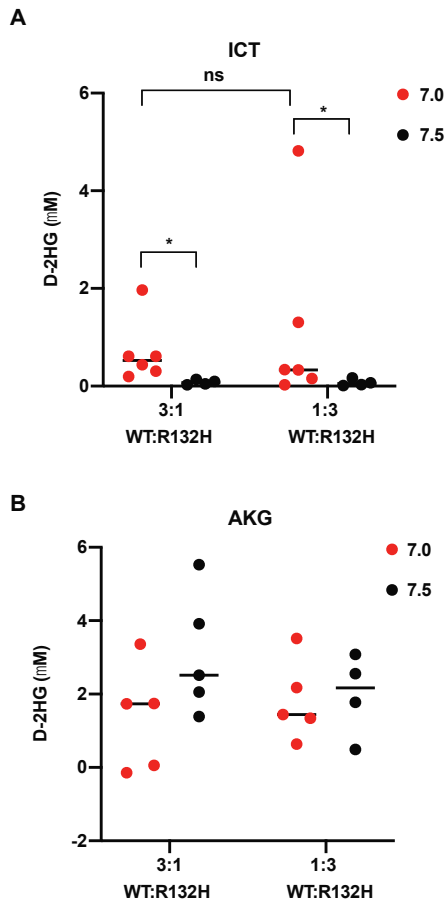

**Figure S2. D-2HG production is pH sensitive with WT:R132H heterodimer even when excess IDH1-WT or IDH1-R132H are present in the reaction mixtures.** Colormetric analysis of enzymatic reactions prepared with mixtures of IDH1-WT and IDH1-R132H. For 3:1 mixtures 3.75  $\mu$ M of IDH1-WT and 1.25  $\mu$ M of IDH1-R132H was used. For 1:3 mixtures 1.25  $\mu$ M of IDH1-WT and 3.75  $\mu$ M of IDH1-R132H was used. Under these conditions, maximal heterodimer formation is consistent across these two conditions, while the 3:1 mixture has excess IDH1-WT and the 1:3 mixture has excess IDH1-R132H. A) Oxidation reactions were prepared with 8 mM ICT, 200  $\mu$ M NADP<sup>+</sup>, and enzyme. B) Reduction reactions were prepared with 8 mM AKG, 500  $\mu$ M NADPH. Shown are scatterplots from 5 experimental replicates from 2 protein preparations (each result is average of 2 technical replicates), medians shown. Significance determined by ratio paired t-test, two-tailed, (\*p<0.01).

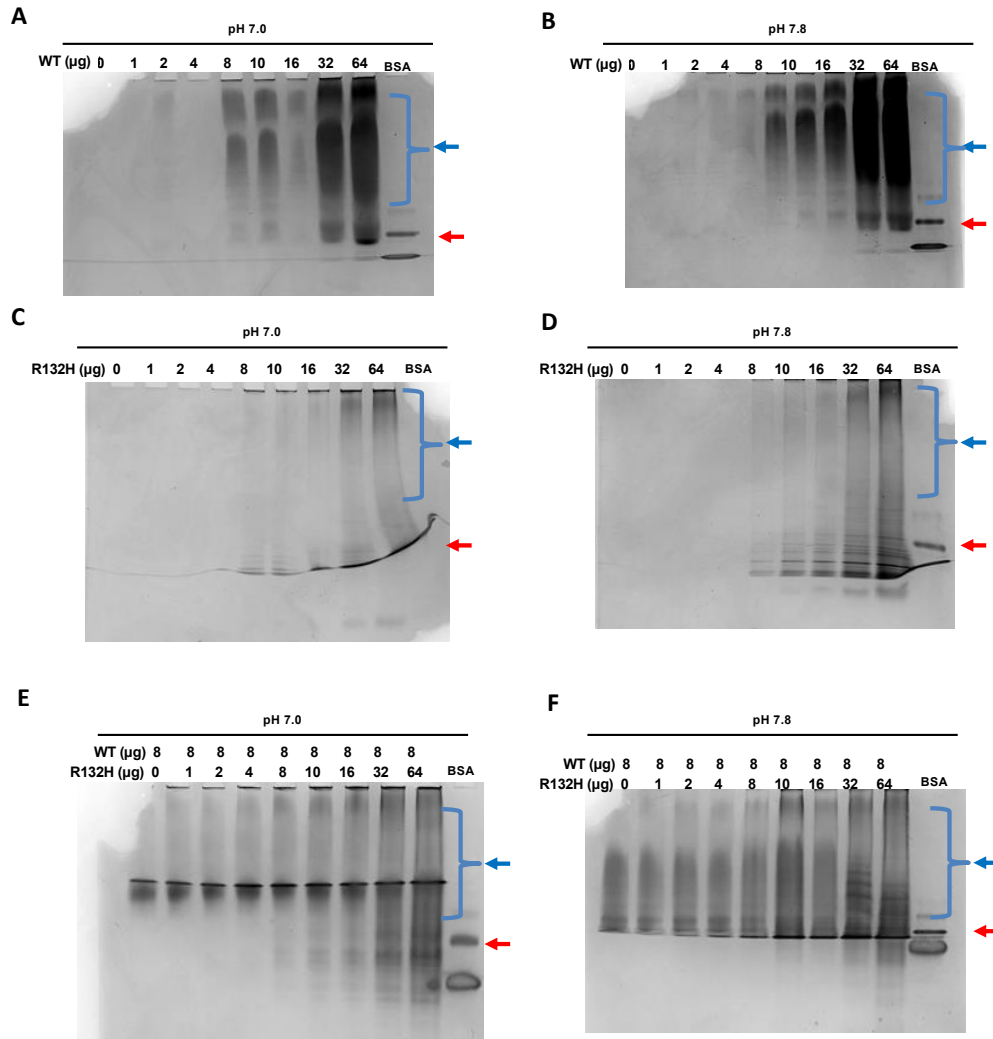

**Figure S3. Representative blots from quantification in Figure 5.** IDH1 protein was run on native gels at two buffer pH values (see methods) and varying protein concentrations. Indicated on the gels are IDH1 monomers (~40 kDa, red arrows), dimers (~80 kDa, blue arrows/brackets). Formation of IDH1-WT homodimer at A) pH 7.0 and B) pH 7.8 is pH-insensitive. Formation of IDH1-R132H homodimer at C) pH 7.0 and D) pH 7.8 is minimal and pH-insensitive. Formation of WT:R132H heterodimer at E) pH 7.0 and F) pH 7.8 is increased at low pH.
